# Supplementary material for: Social Participation and Depression in Old Age: A Fixed-Effects Analysis in 10 European Countries
Source: Oxford University Press journal article supplement (doi:10.1093/aje/kwv015), 2015-05-29
Supplement: kwv015_Supplementary_Data.zip [file kwv015_Supplementary_Data.zip]

Archive with 1 entries (1 files):
- kwv015supp.pdf
