# Supplementary material for: Social Participation and Depression in Old Age: A Fixed-Effects Analysis in 10 European Countries
Source: Oxford University Press journal article supplement (doi:10.1093/aje/kwv015), 2015-05-29
Supplement: kwv015_Supplementary_Data.zip [file kwv015_Supplementary_Data.zip › kwv015supp.pdf]

**Web Table 1.** Contemporary Associations Between Changes in Social Participation and Changes in Depressive Symptom Score Among Respondents Aged 50 Years and Older in the SHARE Longitudinal Sample

|                        | <b>Model 1<sup>a</sup></b> |                      | <b>Model 2<sup>b</sup></b> |                      |
|------------------------|----------------------------|----------------------|----------------------------|----------------------|
|                        | <b>(<i>n</i> = 15,222)</b> |                      | <b>(<i>n</i> = 12,372)</b> |                      |
|                        | <b>β</b>                   | <b>Robust 95% CI</b> | <b>β</b>                   | <b>Robust 95% CI</b> |
| Voluntary/charity work | -0.098                     | -0.181, -0.014       | -0.097                     | -0.203, 0.008        |
| Educational/training   | -0.023                     | -0.115, 0.069        | 0.035                      | -0.078, 0.149        |
| Sport/social club      | -0.126                     | -0.195, -0.056       | -0.102                     | -0.186, -0.019       |
| Religious              | -0.039                     | -0.140, 0.062        | -0.030                     | -0.152, 0.091        |
| Political/community    | -0.124                     | -0.246, -0.003       | -0.170                     | -0.319, -0.022       |

<sup>a</sup> Model 1: social participation (mutually adjusted), age, and time.

<sup>b</sup> Model 2: social participation (mutually adjusted), age, time, household size, marital status, employment status, financial difficulties, self-rated health, long-term illness, limitations (GALI, ADL, IADL), diagnosed heart attack, high blood pressure or hypertension, stroke, diabetes or high blood sugar, and chronic lung disease.

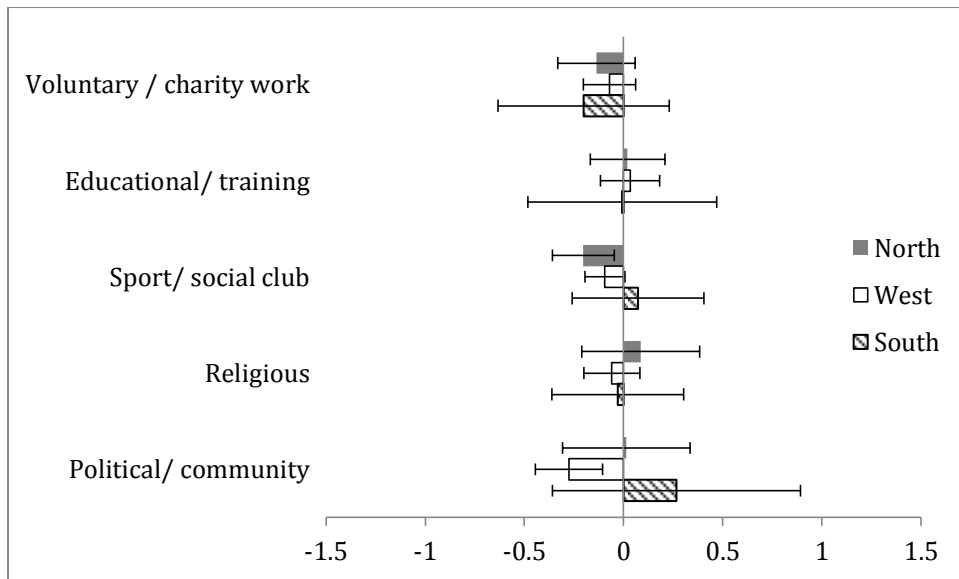

**Web Figure 1.** Contemporary associations ( $\beta$  with robust 95% CIs) between changes in social participation and changes in depressive symptom score, by European region, among participants aged 50 years and older in the SHARE longitudinal sample ( $n = 12,372$ ).

**Web Table 2.** Random-Effects Models: Contemporaneous and Lagged Associations Between Changes in Social Participation and Changes in Depressive Symptom Score Among Respondents Aged 50 Years and Older in the SHARE Longitudinal Sample

|                        | Contemporaneous      |                  |                      |                  | Lagged               |                  |                      |                  |
|------------------------|----------------------|------------------|----------------------|------------------|----------------------|------------------|----------------------|------------------|
|                        | Model 1 <sup>a</sup> |                  | Model 2 <sup>b</sup> |                  | Model 1 <sup>a</sup> |                  | Model 2 <sup>b</sup> |                  |
|                        | (n = 15,222)         |                  | (n = 12,372)         |                  | (n = 9,068)          |                  | (n = 7,385)          |                  |
|                        | $\beta$              | Robust<br>95% CI |
| Voluntary/charity work | -0.206               | -0.267, -0.146   | -0.065               | -0.131, 0.001    | -0.094               | -0.170, -0.017   | -0.058               | -0.145, 0.028    |
| Educational/training   | -0.135               | -0.208, -0.061   | 0.014                | -0.066, 0.093    | -0.146               | -0.239, -0.054   | -0.047               | -0.154, 0.059    |
| Sport/social club      | -0.355               | -0.406, -0.304   | -0.141               | -0.196, -0.085   | -0.248               | -0.316, -0.181   | -0.102               | -0.181, -0.023   |
| Religious              | -0.042               | -0.116, 0.032    | 0.004                | -0.075, 0.084    | -0.124               | -0.221, -0.028   | -0.103               | -0.212, 0.007    |
| Political/community    | -0.258               | -0.347, -0.168   | -0.170               | -0.265, -0.074   | -0.100               | -0.222, 0.023    | 0.014                | -0.126, 0.153    |

<sup>a</sup> Model 1: social participation (mutually adjusted), age, and time.

<sup>b</sup> Model 2: social participation (mutually adjusted), age, time, sex, country, educational level, household size, marital status, employment status, financial difficulties, self-rated health, long-term illness, limitations (GALI, ADL, IADL), diagnosed heart attack, high blood pressure or hypertension, stroke, diabetes or high blood sugar, and chronic lung disease.

**Web Table 3.** Weighted Fixed-Effects Models: Contemporary and Lagged Associations Between Changes in Social Participation and Changes in Depressive Symptom Score Among Respondents Aged 50 Years and Older in the SHARE Longitudinal Sample

|                        | Contemporaneous      |                  |                      |                  | Lagged               |                  |                      |                  |
|------------------------|----------------------|------------------|----------------------|------------------|----------------------|------------------|----------------------|------------------|
|                        | Model 1 <sup>a</sup> |                  | Model 2 <sup>b</sup> |                  | Model 1 <sup>a</sup> |                  | Model 2 <sup>b</sup> |                  |
|                        | (n = 15,222)         |                  | (n = 12,372)         |                  | (n = 9,068)          |                  | (n = 7,385)          |                  |
|                        | $\beta$              | Robust<br>95% CI |
| Voluntary/charity work | -0.071               | -0.198, 0.057    | -0.030               | -0.200, 0.140    | -0.004               | -0.168, 0.160    | -0.072               | -0.289, 0.146    |
| Educational/training   | 0.009                | -0.135, 0.153    | 0.120                | -0.047, 0.287    | -0.031               | -0.238, 0.176    | -0.003               | -0.252, 0.247    |
| Sport/social club      | -0.092               | -0.204, 0.021    | -0.071               | -0.211, 0.069    | 0.018                | -0.121, 0.156    | 0.006                | -0.165, 0.177    |
| Religious/church       | -0.111               | -0.276, 0.054    | -0.107               | -0.308, 0.093    | -0.144               | -0.348, 0.060    | -0.120               | -0.373, 0.133    |
| Political/community    | -0.027               | -0.221, 0.167    | -0.118               | -0.377, 0.140    | 0.128                | -0.135, 0.391    | 0.172                | -0.172, 0.515    |

<sup>a</sup> Model 1: social participation (mutually adjusted), age, and time.

<sup>b</sup> Model 2: social participation (mutually adjusted), age, time, household size, marital status, employment status, financial difficulties, self-rated health, long-term illness, limitations (GALI, ADL, IADL), diagnosed heart attack, high blood pressure or hypertension, stroke, diabetes or high blood sugar, and chronic lung disease.

Abbreviations: ADL, activities of daily living; CI, confidence interval; GALI, global activity limitation index; IADL, instrumental activities of daily living; SHARE, Survey of Health, Ageing and Retirement in Europe.
